# Supplementary material
Source: Springer Nature journal article supplement (https://www.springermedizin.de/resource/supplementary/12884_2011_460_MOESM2_ESM.pdf/9457934)

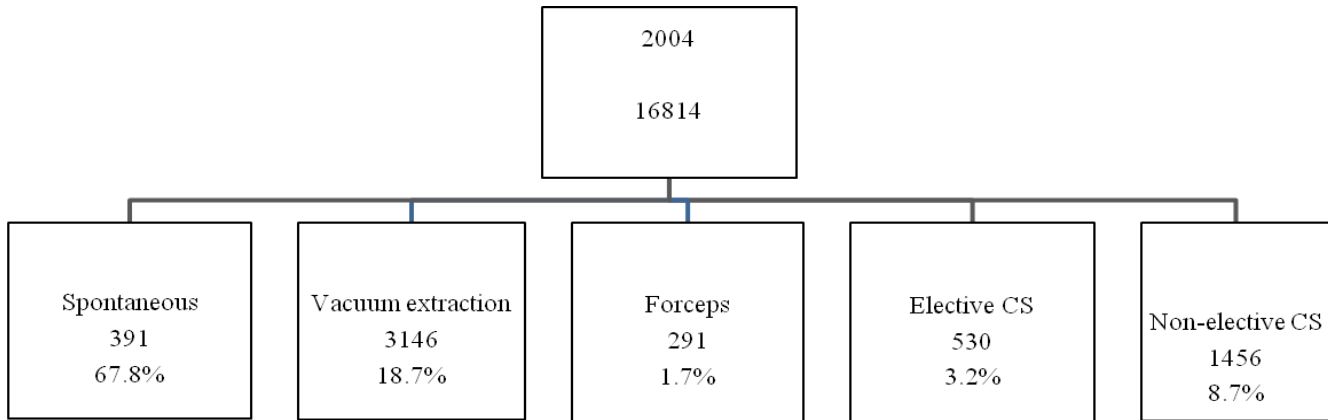

Supplement: MOESM2 [file 9457934]
